# Supplementary material for: Coping strategies adapted by Ghanaians during the COVID-19 crisis and lockdown: A population-based study
Source: PubMed Central journal article supplement (PMC8238213; doi:10.1371/journal.pone.0253800), 2021-06-28
Supplement: pone.0253800.s001.pdf [file pone.0253800.s001.pdf]

**The questionnaire aspects used for the manuscript on “Coping Strategies Adapted by Ghanaians during the COVID-19 Crisis and Lockdown; a Population-based Study”**

**Have you read the information about this study and you agree to participate?**

1. Yes
2. No

**Welcome and thank you for taking part in this survey. The information you will share with us will contribute to a scientific study, so kindly answer as truthfully as possible.**

**Have you participated in this study before?**

1. First time
2. 2.Second time
3. 3.Third time
4. 4.Forth time
5. 5.Fith time
6. 6.Sixth time
7. 7.Seventh time

**Section 1**

**In what country do you live?**

**Do you live in an urban or rural area?**

- 1.Urban
- 2.Rural
- 3.prefer not to say

**What is your sex?**

- 1 = Female
- 2 = Male
- 3 = Prefer not to say

**What is your age range?**

- 1 = Under 18 years old.
- 2 = 18-24years old.
- 3 = 25-34years old.
- 4 = 35-44years old.
- 5 =45-54 years old.
- 6 = 55-64 years old
- 7=65 +
- 8=prefer not to say/dont know

**Which of the following best describes your current relationship status?**

- 1 = Married
- 2 = widowed
- 3 = Separated/Divorced
- 4 = single but cohabiting with a significant other
- 5 = Single/never married
- 6. Prefer not to say/I dont know

**How many children do you have?**

- 1= No children
- 2= one
- 3= Two
- 4= Three
- 5 = Four
- 6 = More than four
- 7=prefer not to say/dont know

**What is your highest level of education?**

- 1= I didn't attend school
- 2=Primary
- 3= Secondary
- 4= Bachelor

5=Masters

6=Doctorate/PhD

7=prefer not to say/dont know

**What is your work situation?**

1= no employment

2= agriculture/farming

3= daily worker/small income job

4= employee

5= government employee

6= business owner

7=prefer not to say

**In the context of your country, what economic category fits best with your situation?**

1: low income

2: lower middle income

3: higher middle income

4: high income

**Section 2**

**1.Is the country where you live implementing the lockdown measures?**

1=Yes

2=No

3=Not sure

**2.Have you yourself been infected by the COVID-19 virus?**

1=Yes

2=No

3=Not sure

**3.Has someone in your household been infected by the COVID-19 virus?**

1=Yes

2=No

3=Not sure

**4.Has someone close to you been infected by the COVID-19 virus?**

1=Yes

2=No

3=Not sure

**5.Has someone close to you died from the COVID-19 virus?**

1=Yes

2=No

3=Not sure

**6.How concerned are you about your own health and the health of your family in relation to the COVID-19 virus?**

Not at all concerned (5)

Slightly concerned (4)

Somewhat concerned (3)

Moderately concerned (2)

Extremely concerned (1)

**7.Are you concerned about supporting your family financially because of the COVID-19 virus?**

1=Yes

2=No

3=Not sure

**8.How difficult do you find it to switch off from media (TV news, newspapers) and social media (Twitter, Whatsapp) reporting about COVID-19?**

Very easy (1)

Easy(2)

Neither easy nor difficult (3)

Difficult(4)

Very difficult(5)

**9. Weighing the positives and the negatives, has your life become better or worse since the COVID-19 crisis started?**

Much worse (5)

worse (4)

About the same (3)

Better(2)

Much better(1)

**10. Do you think the situation in your country will be well controlled or will it go out of control?**

Very well controlled (1)

Somewhat controlled (2)

Neutral (3)

Out of control (4)

Totally out of control (5)

**11. We will present to you a number of activities that you typically do at home. Kindly indicate whether in this period you engage in them less, the same or more compared to before the lockdown**

a) Watching tv

Less (1) Same (2) More (3) Prefer not to say/Not applicable (4)

b) Spending time on internet (not for work)

Less (1) Same (2) More (3) Prefer not to say/Not applicable (4)

c) Spending time on social media (not for work)

Less (1) Same (2) More (3) Prefer not to say/Not applicable (4)

d) Working from home or performing other income generating activities

Less (1) Same (2) More (3) Prefer not to say/Not applicable (4)

e) Performing household chores; doing house repairs

Less (1) Same (2) More (3) Prefer not to say/Not applicable (4)

f) Doing sports

Less (1)    Same (2)    More (3)    Prefer not to say/Not applicable (4)

g) Talking to friends and relatives over the phone

Less (1)    Same (2)    More (3)    Prefer not to say/Not applicable (4)

h) Praying

Less (1)    Same (2)    More (3)    Prefer not to say/Not applicable(4)

i) Resting/relaxing

Less (1)    Same (2)    More (3)    Prefer not to say/Not applicable (4)

j) Sleeping

Less (1)    Same (2)    More (3)    Prefer not to say/Not applicable (4)

**In your own appreciation, do you think you are coping well with the COVID-19 situation?**

1. Not well at all
2. Not well
3. Average
4. Well
5. Very well
